# Supplementary material
Source: PubMed Central journal article supplement (PMC4000578)
Supplement: NIHMS571900-supplement-Supp_figuresS1-S5_tableS1.pdf [file NIHMS571900-supplement-Supp_figuresS1-S5_tableS1.pdf]

## SUPPLEMENTARY MATERIAL

Pages 1-2      **Supplementary Table S1**  
Pages 3-7      **Supplementary Figures S1-S5**  
Page 8         **Supplementary References**

## SUPPLEMENTARY TABLE

**Table S1. Oligonucleotide sequences used**

| Oligonucleotide                                        | Sequence <sup>a</sup>                                                               |
|--------------------------------------------------------|-------------------------------------------------------------------------------------|
| <b>Cloning</b>                                         |                                                                                     |
| P120brlR                                               | GCGCGCGCAAGCTTGATGGGTTCACTGTTG                                                      |
| P250brlR                                               | GCGCGCGCAAGCTTTGCTTGTGCTGTACTTGC                                                    |
| P500brlR                                               | GCGCGCGCAAGCTTCCAGCTGCATCAATTCCTC                                                   |
| PrevbrlR                                               | GCGCGCGCGGATCCTACCGGCAGACTACGGATTG                                                  |
| PetbrlRF                                               | CACCATGCTCACCATCGGC                                                                 |
| PetbrlRR                                               | ATAGATGGGGATATACAGGTCGAC                                                            |
| BrlRhisexcisF                                          | GCGCGCGCGCTAGCATGCTCACCATCGGCC                                                      |
| BrlRhisexcisR                                          | GCGCGCGCACTAGTTCAATGGTGATGGTGATG                                                    |
| V5-fleQ-NheI-for                                       | GCGCGCGCTAGCATGggttaagcctatccctaaccctctcctcggtctcgattctacgATGTGGCGCGAAA<br>CCAAACTC |
| fleQ-SacI-rev                                          | GCGCGCGGAGCTCTCAATCATCCGACAGGTCGTC                                                  |
| <b>Chromatin immunoprecipitation (ChIP enrichment)</b> |                                                                                     |
| PrevbrlR                                               | GCGCGCGCGGATCCTACCGGCAGACTACGGATTG                                                  |
| P120brlR                                               | GCGCGCGCAAGCTTGATGGGTTCACTGTTG                                                      |
| pscF_GS_R                                              | CCACGGTATCGAGGGTATTC                                                                |
| pscE_GS_F                                              | AAGCGGTCTCGGCATTCTTTC                                                               |
| <b>5'RACE</b>                                          |                                                                                     |
| 5'RACE abridged anchor primer                          | GGCCACGCGTCGACTAGTACGGGGGGGGGG                                                      |
| GSP1                                                   | CAGGGTGTGCTGGTGTCTGTTGCAG                                                           |
| GSP2                                                   | GAACGTCCAGCCGGCGCAG                                                                 |
| GSP3                                                   | GAGTATGCGCGAGAGCTGCTCGATC                                                           |
| <b>EMSA/Streptavidin bead assays</b>                   |                                                                                     |
| PbrlR-120F <sup>a</sup>                                | ATGGGTTCACTGTTGGGAC                                                                 |
| PbrlR-120R                                             | GGTTCCTGCTGCGGGATAC                                                                 |
| PbrlR-7-108bp-F                                        | CGGGAGGCGACGGCGGAC                                                                  |
| PbrlR-7-108bp-R                                        | TTCCTGCTGCGGGATACC                                                                  |
| PbrlR-regionC-F                                        | ACTCGCTCACACCCTTGG                                                                  |
| PbrlR-regionC-R                                        | GTCCGCCGTCGCCTCCCG                                                                  |
| PbrlR-regionB-F                                        | GGGTCATCTCGCTACCCG                                                                  |
| PbrlR-regionB-R                                        | CCAAGGGTGTGAGCGAGT                                                                  |
| PbrlR-regionA-F                                        | GCTTCCTTACGGAGGCGG                                                                  |
| PbrlR-regionA-R                                        | CGGTGAGCGAGATGACCC                                                                  |
| pscE_GS_F                                              | AAGCGGTCTCGGCATTCTTTC                                                               |

|                          |                             |
|--------------------------|-----------------------------|
| pscF_GS_R                | CCACGGTATCGAGGGTATTC        |
| 19bp-promF               | TTGCCCCAGGGGCAATCCG         |
| 19bp-promR <sup>a</sup>  | CGGATTGCCCTGGGGCAA          |
| prom-mut1-F              | TTGCCCCATTTCAATCCG          |
| Prom-mut1-R <sup>a</sup> | CGGATTGAAAATGGGGCAA         |
| prom-mut2-F              | GGCAATCCGCGATGGGTT          |
| prom-mut2-R <sup>a</sup> | AACCCATCGCGGATTGCC          |
| -10-promF                | TTGCCCCAGGGGCAATCCGTAGTCTGC |
| -10-promR <sup>a</sup>   | GCAGACTACGGATTGCCCTGGGGCAA  |
| -35-promF                | CCTTGACCTTGCCCCAGGGGCAATCCG |
| -35-promR <sup>a</sup>   | CGGATTGCCCTGGGGCAAGGTCAAGG  |

**RT-PCR/PCR**

|             |                            |
|-------------|----------------------------|
| mreBf       | CTGTGATCGACCTGGG           |
| mreBr       | CAGCCATCGGCTCTTCG          |
| brIR_RT-for | GCAACGACACCAGCACAC         |
| brIR_RT-rev | GAAGCGTCCCAGAGCTG          |
| mexE-for    | GTCATCGAACAACCGCTG         |
| mexE-re     | GTCGAAGTAGGCGTAGACC        |
| Pser-up     | CGAGTGGTTTAAGGCAACGGTCTTGA |
| Pser-down   | AGTTCGGCCTGGTGGAGCAACTCG   |

---

<sup>a</sup>, Primers are biotinylated. Non-biotinylated primers were used for the generation of non-biotinylated competitor DNA. Sequence for V5-tag is indicated by lower case letters.

**SUPPLEMENTARY FIGURES.**

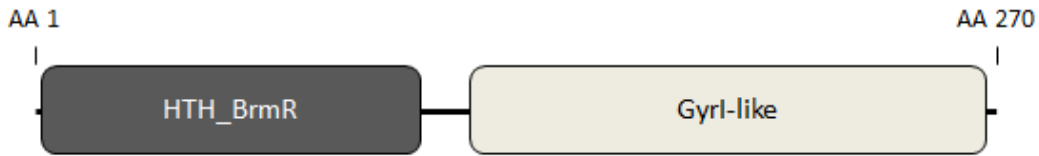

**Figure S1. BrIR domain organization.** HTH\_BrmR, Helix-Turn-Helix DNA binding domain of the MerR BmrR transcription regulator; Gyrl-like, Gyrl-like small molecule binding domain. AA, indicates amino acid position.

```

brlR          CCCAGGGGCAATCCGTAGTCTGCCGGTATCCCGCAGCAGGAACCGGAAATGCTCACCATC
RACE1         TCGACTAGTACGGGGGGGGGGGGTGTATCCCGCAGCAGGAACCGGAAATGCTCACCATC
RACE2         TCGACTAGTACGGGGGGGGGGGGTGTATCCCGCAGCAGGAACCGGAAATGCTCACCATC
.....
*****
brlR          GGCCAACTGGCGCGAATCTTCGAGATCTCCACCAAGACGCTTCGCCACTACGATGCCATC
RACE1         GGCCAACTGGCGCGAATCTTCGAGATCTCCACCAAGACGCTTCGCCACTACGATGCCATC
RACE2         GGCCAACTGGCGCGAATCTTCGAGATCTCCACCAAGACGCTTCGCCANTACGATGCCATC
.....
*****
brlR          GGCTGTTTCGTCCCGCGCGCACCCGGTAGCGACAACGGCTACCGCTACTA-CCAGCCGGA
RACE1         GGCTGTTTCGTCCCGCGCGCACCCGGTAGCGACAACGGCTACCGCTACTA-CCAGCCGGA
RACE2         GGCTGTTTCGTCCCGCGCGCACCCGGTAGCGACAACGGCTACCGCTACTATCCAGCCGG-
*****

```

**Figure S2. Alignment of DNA sequences obtained from the 5'RACE experiment with DNA sequences upstream and downstream of the ATG start codon of *brlR*.** The DNA sequences RACE1 and RACE2 represent biological replica clones obtained by anchored PCR. The sequence GGCCACGCGTCGACTAGTACGGGGGGGGGG originates from the 5'RACE abridged anchor primer (Table S1) which was added during PCR amplification, following homopolymeric dC-tailing of the 5' end of the cDNA. \*, denotes identical nucleotides.

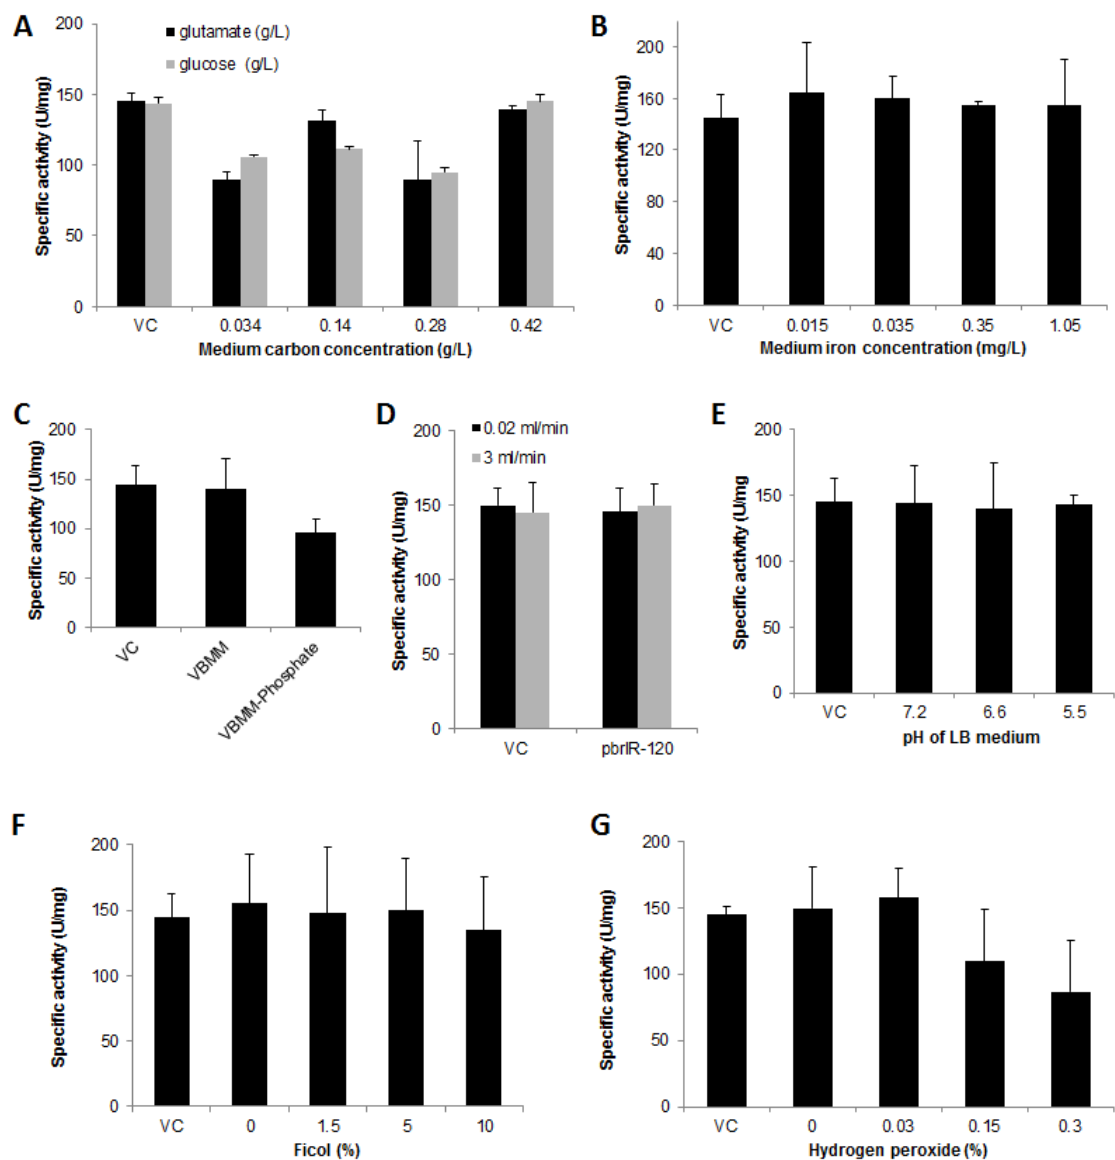

**Figure S3. Environmental factors that do not induce *brlR* expression.** Specific  $\beta$ -galactosidase activity was determined from cells obtained from the promoter reporter strain PAO1::*PbrlR*-120-lacZ grown to exponential phase (A) in Vogel-Bonner minimal medium (VBMM) (Schweizer, 1991) with increasing concentrations of glutamate or glucose, (B) iron, or (C) in the absence or presence of phosphate. An iron concentration of 0.035 mg/L is normally present in VBMM. (D) Specific  $\beta$ -galactosidase activity was determined from cells grown in LB medium in a chemostat for 16 hr at a flow rate of 0.02 or 3 ml/min. (E) Specific  $\beta$ -galactosidase activity was determined using cells grown planktonically to exponential phase in MOPS-buffered LB medium in which the pH was adjusted as indicated using KOH, (F) or in LB medium containing 0-10% ficol to vary the

viscosity of the medium. (G). Specific  $\beta$ -galactosidase activity in cells grown planktonically in LB medium for 16 hr to stationary phase prior to and after the addition of 0-0.3% hydrogen peroxide for 30 min. Sodium thiosulfate was used to neutralize hydrogen peroxide following the 30 min exposure time. PAO1 harboring an empty pMini-CTX-*lacZ* vector was used as vector control (VC). pbrlR-120, *brlR* promoter reporter strain PAO1::*PbrlR*-120-*lacZ*. All experiments were carried out at least in triplicate. Error bars denote standard deviation.

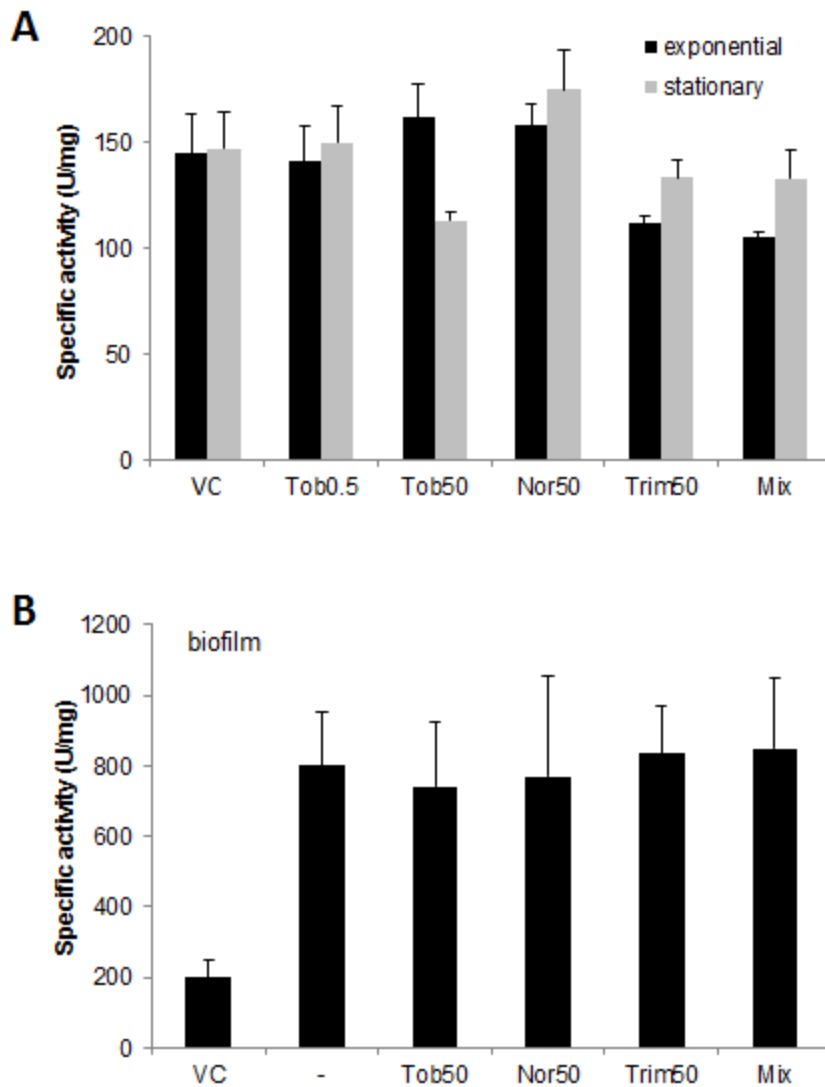

**Figure S4. *brlR* expression is not induced upon exposure to antimicrobial agents.** Specific  $\beta$ -galactosidase activity was determined from cells obtained from the reporter strain PAO1::*PbrlR*-120-lacZ (A) grown planktonically to exponential and stationary phase or (B) grown as biofilms for 5 days. Biofilm cells subsequently exposed for 1 hr under flowing conditions to 50  $\mu$ g/ml of tobramycin (Tob50), norfloxacin (Nor50), trimethoprim (Trim50), or a mixture of the three antibiotics (Mix). Planktonic cells were exposed for 30 min to the antibiotics. All experiments were carried out at least in triplicate. Error bars denote standard deviation. PAO1 harboring an empty pMini-CTX vector was used as vector control (VC).

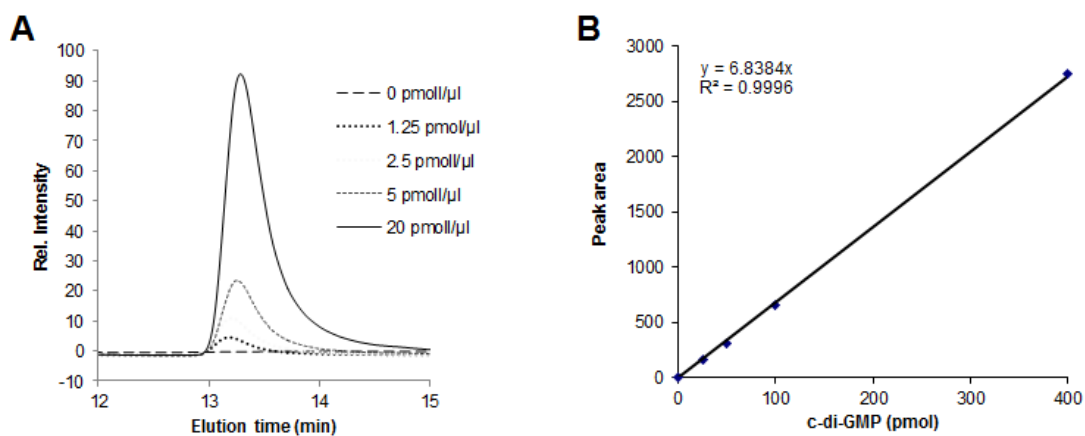

**Figure S5. Detection and quantitation of c-di-GMP.** (A) Detection of increasing concentrations of commercially available c-di-GMP by HPLC. (B) Standard curve based on HPLC-derived peak areas of c-di-GMP. A total of 20 μl of the respective c-di-GMP solutions were analyzed. C-di-GMP detection and quantitation was performed as described in detail by Basu Roy et al. (Basu Roy *et al.*, 2013).

## Supplementary References

- Basu Roy, A., O.E. Petrova & K. Sauer, (2013) Extraction and Quantification of Cyclic Di-GMP from *Pseudomonas aeruginosa*. *bio-protocol*: <http://www.bio-protocol.org/wenzhang.aspx?id=828>.
- Schweizer, H.P., (1991) The *agmR* gene, an environmentally responsive gene, complements defective *glpR*, which encodes the putative activator for glycerol metabolism in *Pseudomonas aeruginosa*. *J. Bacteriol.* **173**: 6798-6806.
